# Supplementary material
Source: PubMed Central journal article supplement (PMC9235523)
Supplement: NIHMS1627554-supplement-Supp_Data_1.pdf [file NIHMS1627554-supplement-Supp_Data_1.pdf]

### **Supplementary Material: Hemi-gland Cryoablation technique**

Briefly, with the patient under general anesthesia and in lithotomy position, five thermocouple sensors were inserted transperineally at the following areas: bilateral neurovascular bundles, Denonvillier's fascia (at side of the lobe of interest), prostate apex, and external rhabdosphincter. Next, 2-3 cryo-needles were placed transperineally into the prostate in a configuration that creates an ice-ball completely encompassing one lobe of the prostate containing the index PCa lesion. After insertion of urethral warming catheter, cryoablation was started from anterior to posterior cryoprobe. Using an argon/helium gas-based system (Endocare, HealthTronics Inc., Austin, TX) a double freeze-thaw cycle was performed to reach -40° Celsius in the ipsilateral thermocouple sensors (neurovascular bundle, Denonvillier's fascia and apex) and extending the ice-ball within the entire prostate lobe, under TRUS monitoring to ensure complete hemi-gland ablation.
