# Supplementary material
Source: PubMed Central journal article supplement (PMC9235523)
Supplement: NIHMS1627554-supplement-Supp_Fig_1.pdf [file NIHMS1627554-supplement-Supp_Fig_1.pdf]

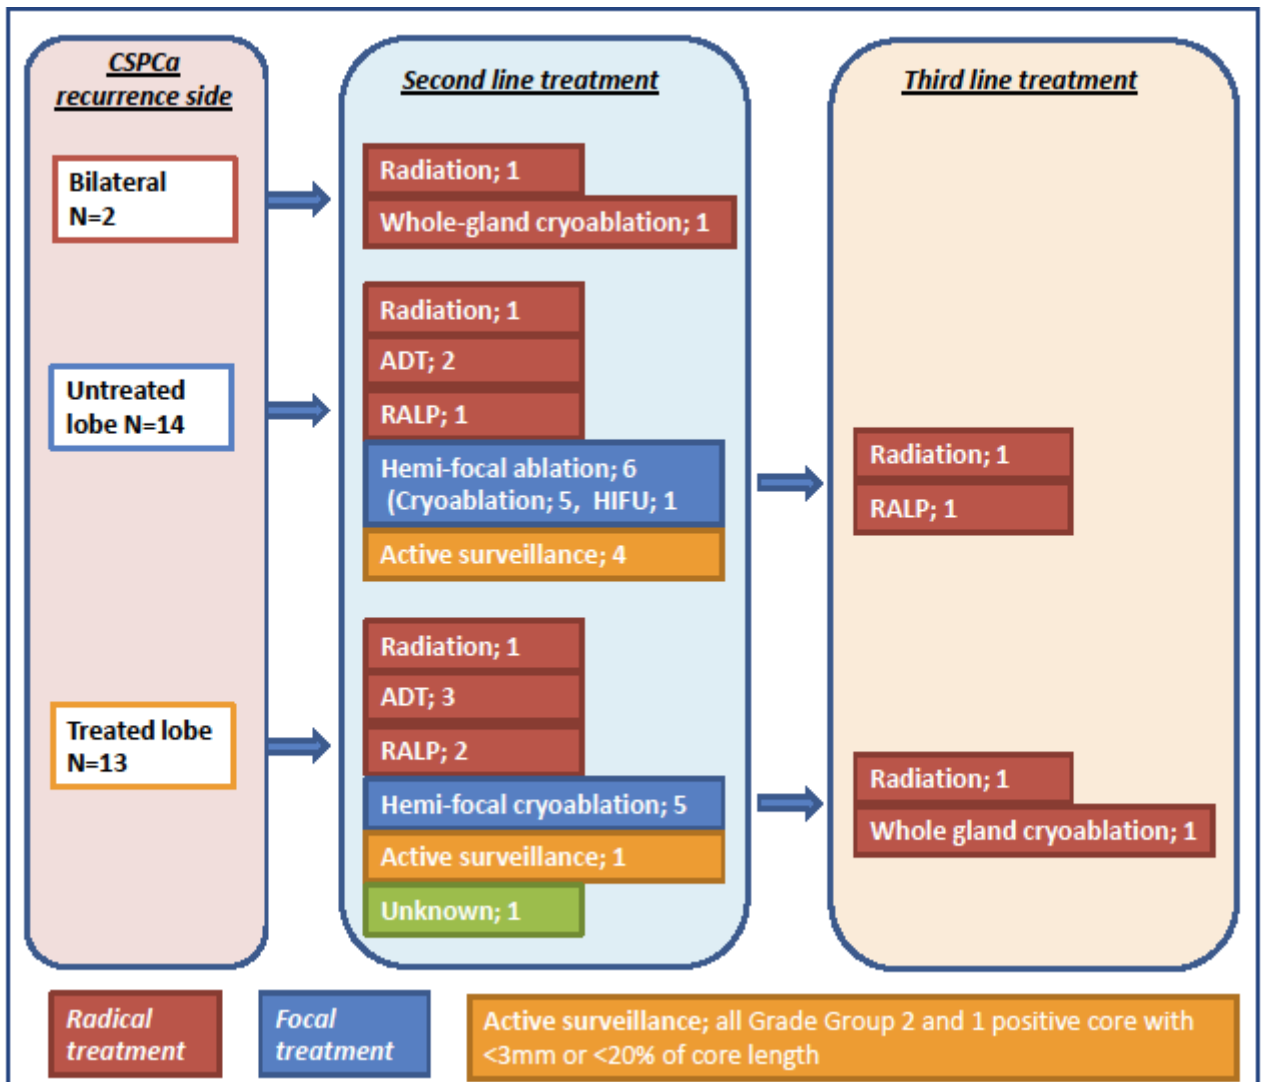

Second-line and third-line treatments after detection of CSPCa on followup biopsy after hemigland cryoablation. CSPCa, clinically significant prostate cancer; ADT, androgen deprivation therapy; RALP, robot-assisted laparoscopic prostatectomy.
