# Supplementary material
Source: PubMed Central journal article supplement (PMC9235523)
Supplement: NIHMS1627554-supplement-Supp_Table_1.pdf [file NIHMS1627554-supplement-Supp_Table_1.pdf]

**Supplementary Table 1A: Predictors for biochemical failure and clinically significant prostate cancer recurrence on follow up biopsy post hemi-gland cryoablation for prostate cancer.**

|                                           | Biochemical failure (PSA nadir + 2ng/mL - Phoenix) |                  |                       |              | Clinically significant cancer recurrence * |              |                        |              |
|-------------------------------------------|----------------------------------------------------|------------------|-----------------------|--------------|--------------------------------------------|--------------|------------------------|--------------|
|                                           | Univariate                                         |                  | Multivariable         |              | Univariate                                 |              | Multivariable          |              |
|                                           | HR, CI 95%                                         | p value          | HR, CI 95%            | p value      | HR, CI 95%                                 | p value      | HR, CI 95%             | p value      |
| <b>Age, years</b>                         | 1.01, 0.97-1.05                                    | 0.56             | -                     | -            | 1.02, 0.98-1.07                            | 0.32         | -                      | -            |
| <b>Prostate volume, cc</b>                | 1.00, 0.99-1.02                                    | 0.74             | -                     | -            | 0.99, 0.97-1.01                            | 0.36         | -                      | -            |
| <b>PSA, ng/mL</b>                         | 1.10, 1.05-1.15                                    | <b>&lt;0.001</b> | <b>1.06,1.00-1.12</b> | <b>0.048</b> | 1.09, 1.03-1.15                            | <b>0.002</b> | <b>1.10, 1.04-1.16</b> | <b>0.001</b> |
| <b>PSAD, ng/mL/cc</b>                     | 32.4, 4.41-237.5                                   | <b>&lt;0.001</b> | -                     | -            | 32.9, 3.63-298.7                           | <b>0.002</b> | -                      | -            |
| <b>PSAD&gt;0.15</b>                       | 1.94, 0.99-3.79                                    | 0.05             | -                     | -            | 1.82, 0.85-3.92                            | 0.13         | -                      | -            |
| <b>PSAD&gt;0.25</b>                       | 2.58, 1.35-4.95                                    | <b>0.004</b>     | -                     | -            | 3.05, 1.46-6.37                            | <b>0.003</b> | -                      | -            |
| <b>Clinical stage, T2 vs T1</b>           | 1.33, 0.68-2.59                                    | 0.40             | -                     | -            | 1.16, 0.54-2.51                            | 0.69         | -                      | -            |
| <b>Grade groups</b>                       |                                                    |                  |                       |              |                                            |              |                        |              |
| <b>2-5 vs 1</b>                           | 1.19, 0.59-2.42                                    | 0.62             | -                     | -            | 2.32, 0.88-6.10                            | 0.09         | 2.11, 0.60-7.43        | 0.25         |
| <b>3-5 vs 1-2</b>                         | 1.38, 0.73-2.59                                    | 0.33             | -                     | -            | 1.73, 0.83-3.56                            | 0.14         | -                      | -            |
| <b>4-5 vs 1-3</b>                         | 0.83, 0.32-2.13                                    | 0.70             | -                     | -            | 0.99, 0.35-2.88                            | 0.99         | -                      | -            |
| <b>Number of cancer core, no</b>          | 1.08, 0.84-1.39                                    | 0.55             | -                     | -            | 1.12, 0.84-1.50                            | 0.43         | -                      | -            |
| <b>Maximum cancer core length, mm</b>     | 1.00, 0.93-1.09                                    | 0.89             | -                     | -            | 1.05, 0.96-1.15                            | 0.27         | -                      | -            |
| <b>Maximum cancer core, %</b>             | 0.99, 0.98-1.00                                    | 0.37             | -                     | -            | 1.00, 0.99-1.01                            | 0.91         | -                      | -            |
| <b>Risk classification</b>                |                                                    |                  |                       |              |                                            |              |                        |              |
| <b>Low vs High and Intermediate</b>       | 0.46, 0.18-1.18                                    | 0.10             | 0.60, 0.21-1.52       | 0.26         | 0.25, 0.06-1.07                            | 0.06         | 0.66, 0.10-4.25        | 0.66         |
| <b>Low vs High</b>                        | 0.49, 0.16-1.56                                    | 0.23             | -                     | -            | 0.23, 0.05-1.13                            | 0.07         | -                      | -            |
| <b>Intermediate vs High</b>               | 1.09, 0.48-2.54                                    | 0.82             | -                     | -            | 0.87, 0.35-2.16                            | 0.76         | -                      | -            |
| <b>Bilateral cancer</b>                   | 2.49, 0.87-7.09                                    | 0.09             | 1.90, 0.63-5.71       | 0.25         | 2.55, 0.77-8.49                            | 0.13         | 2.59, 0.76-8.79        | 0.13         |
| <b>Use of neoadjuvant ADT (Yes vs No)</b> | 0.96, 0.42-2.18                                    | 0.92             | -                     | -            | 0.78, 0.27-2.25                            | 0.65         | -                      | -            |

HR, hazard ratio; CI, confidence interval; PSA, Prostate specific antigen; PSAD, PSA density; ADT, androgen deprivation therapy

\* Clinically significant cancer recurrence was defined as Grade Group  $\geq 2$  on follow-up biopsy (including both treated and untreated lobes).

**Supplementary Table 1B: Predictors for radical treatment and treatment failure post hemi-gland cryoablation for prostate cancer.**

|                                    | Radical treatment* |         |                        |              | Treatment Failure** |             |                        |             |
|------------------------------------|--------------------|---------|------------------------|--------------|---------------------|-------------|------------------------|-------------|
|                                    | Univariate         |         | Multivariable          |              | Univariate          |             | Multivariable          |             |
|                                    | HR, CI 95%         | p value | HR, CI 95%             | p value      | HR, CI 95%          | p value     | HR, CI 95%             | p value     |
| Age, years                         | 1.02, 0.95-1.09    | 0.60    | -                      | -            | 1.00, 0.95-1.06     | 0.89        | -                      | -           |
| Prostate volume, cc                | 1.01, 0.98-1.04    | 0.44    | -                      | -            | 0.99, 0.97-1.03     | 0.94        | -                      | -           |
| PSA, ng/mL                         | 1.14, 1.06-1.24    | <0.001  | <b>1.13, 1.05-1.23</b> | <b>0.002</b> | 1.14, 1.07-1.21     | <0.001      | <b>1.16, 1.08-1.24</b> | <0.001      |
| PSAD, ng/mL/cc                     | 19.6, 0.34-11.0    | 0.15    | -                      | -            | 106.4, 7.01-1615    | <0.001      | -                      | -           |
| PSAD > 0.15                        | 2.75, 0.74-10.2    | 0.13    | -                      | -            | 3.41, 1.13-10.3     | <b>0.03</b> | -                      | -           |
| PSAD > 0.25                        | 2.61, 0.83-8.27    | 0.10    | -                      | -            | 3.15, 1.28-7.77     | <b>0.01</b> | -                      | -           |
| Clinical stage, T2 vs T1           | 0.51, 0.14-1.89    | 0.31    | -                      | -            | 0.92, 0.37-2.29     | 0.86        | -                      | -           |
| <b>Grade Groups</b>                |                    |         |                        |              |                     |             |                        |             |
| 2-5 vs 1                           | 1.11, 0.33-3.7     | 0.86    | -                      | -            | 1.93, 0.64-5.86     | 0.24        | -                      | -           |
| 3-5 vs 1-2                         | 1.39, 0.44-4.34    | 0.57    | -                      | -            | 2.61, 1.05-6.51     | <b>0.04</b> | <b>3.06, 1.06-8.85</b> | <b>0.04</b> |
| 4-5 vs 1-3                         | 0.52, 0.07-4.07    | 0.53    | -                      | -            | 1.02, 0.32-3.83     | 0.87        | -                      | -           |
| Number of cancer core, no          | 1.23, 0.75-2.01    | 0.41    | -                      | -            | 1.11, 0.76-1.62     | 0.59        | -                      | -           |
| Maximum cancer core length, mm     | 1.09, 0.95-1.25    | 0.21    | -                      | -            | 1.06, 0.95-1.19     | 0.26        | -                      | -           |
| Maximum cancer core, %             | 1.01, 0.99-1.03    | 0.36    | -                      | -            | 1.01, 0.99-1.03     | 0.15        | -                      | -           |
| <b>Risk classification</b>         |                    |         |                        |              |                     |             |                        |             |
| Low vs High and Intermediate       | 0.28, 0.04-2.11    | 0.21    | 0.37, 0.05-2.99        | 0.35         | 0.17, 0.02-1.31     | 0.09        | 0.48, 0.05-4.26        | 0.51        |
| Low vs High                        | 0.32, 0.03-3.51    | 0.34    | -                      | -            | 0.13, 0.02-1.12     | 0.06        | -                      | -           |
| Intermediate vs High               | 1.22, 0.26-5.73    | 0.80    | -                      | -            | 0.68, 0.24-1.94     | 0.48        | -                      | -           |
| Bilateral cancer                   | 1.00, 0.85-1.16    | 0.99    | -                      | -            | 1.00, 0.85-1.18     | 0.99        | -                      | -           |
| Use of neoadjuvant ADT (Yes vs No) | 1.00, 0.79-1.26    | 0.99    | -                      | -            | 0.58, 0.13-2.52     | 0.47        | -                      | -           |

HR, hazard ratio; CI, confidence interval; PSA, Prostate specific antigen; PSAD, PSA density; ADT, androgen deprivation therapy.

\* Radical treatment was defined as any whole-gland treatment. \*\* Treatment failure was defined as any whole-gland treatment, initiation of androgen deprivation therapy, metastases or prostate cancer-specific mortality.
